# Supplementary material for: A place to call home: study protocol for a longitudinal, mixed methods evaluation of two housing first adaptations in Sydney, Australia
Source: Springer Nature journal article supplement (doi:10.1186/s12889-015-1700-y), 2015-04-08
Supplement: MOESM2 [file 9749226]

1 **Additional File 2: Flowchart of recruitment process for client survey participants**

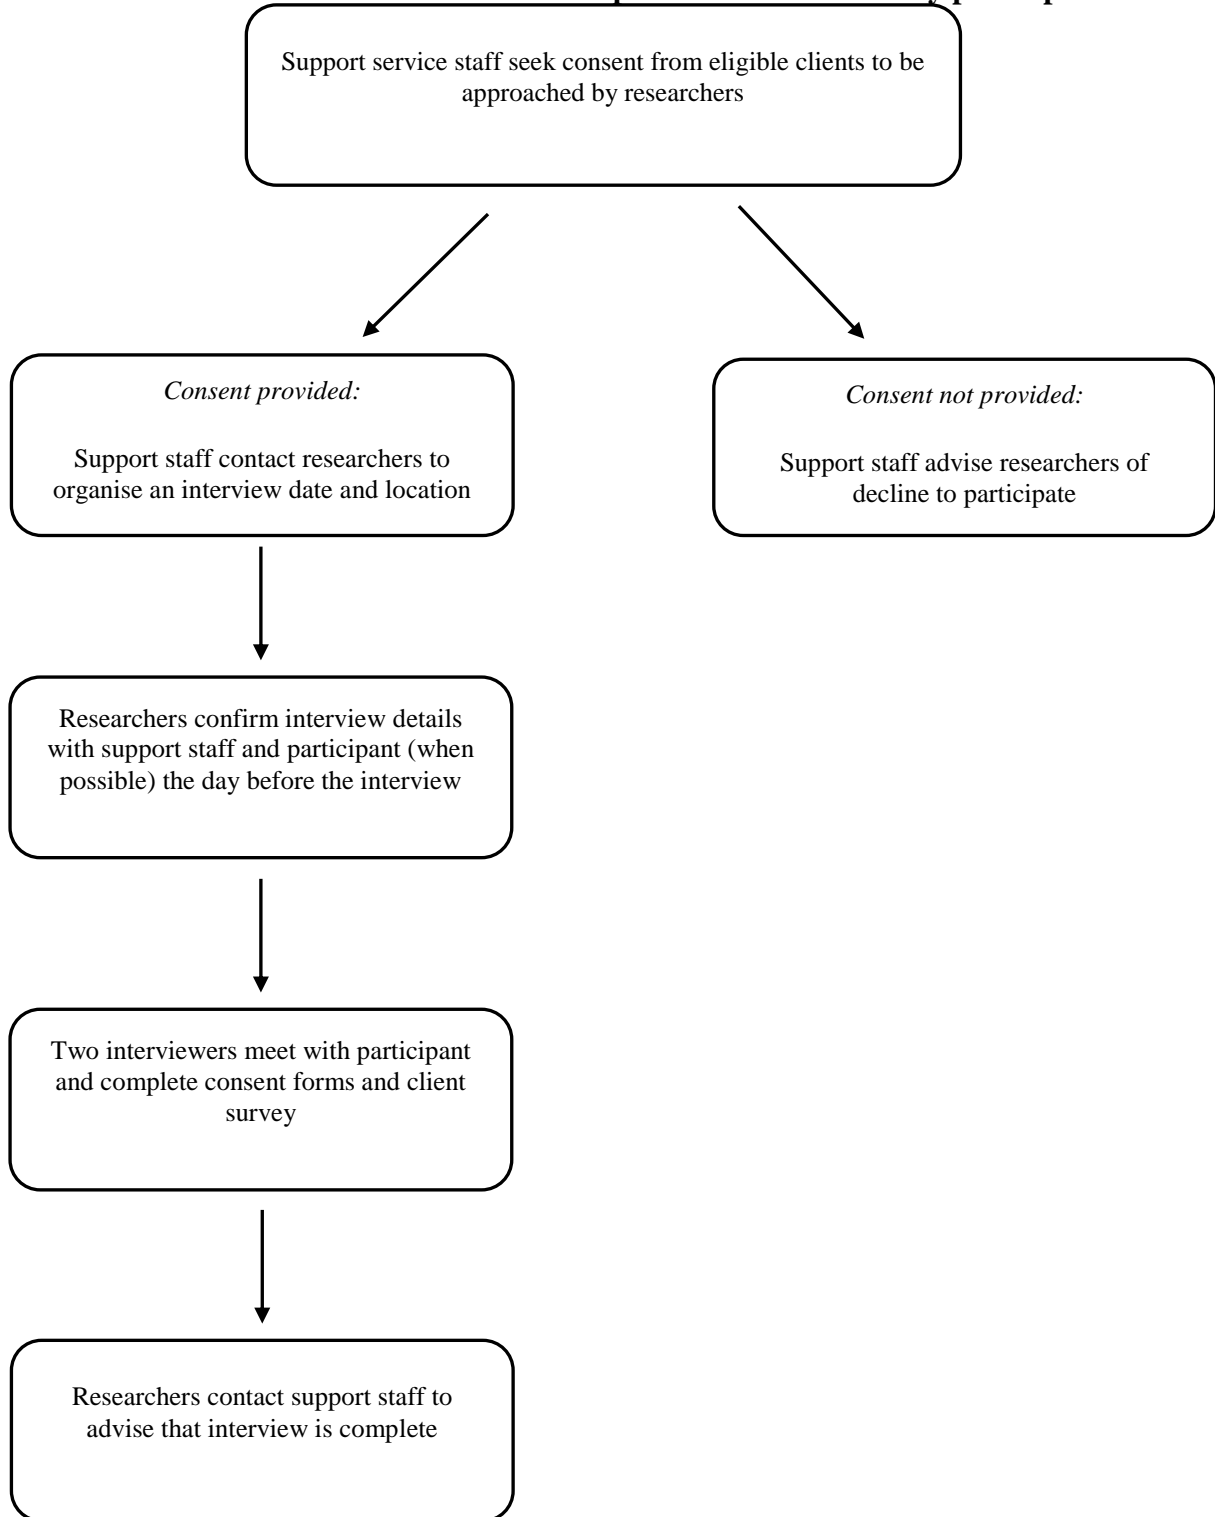

2  
3  
4  
5  
6  
7
