# Supplementary material for: A place to call home: study protocol for a longitudinal, mixed methods evaluation of two housing first adaptations in Sydney, Australia
Source: Springer Nature journal article supplement (doi:10.1186/s12889-015-1700-y), 2015-04-08

1 **Additional File 3: Flowchart of follow-up process for client survey participants**

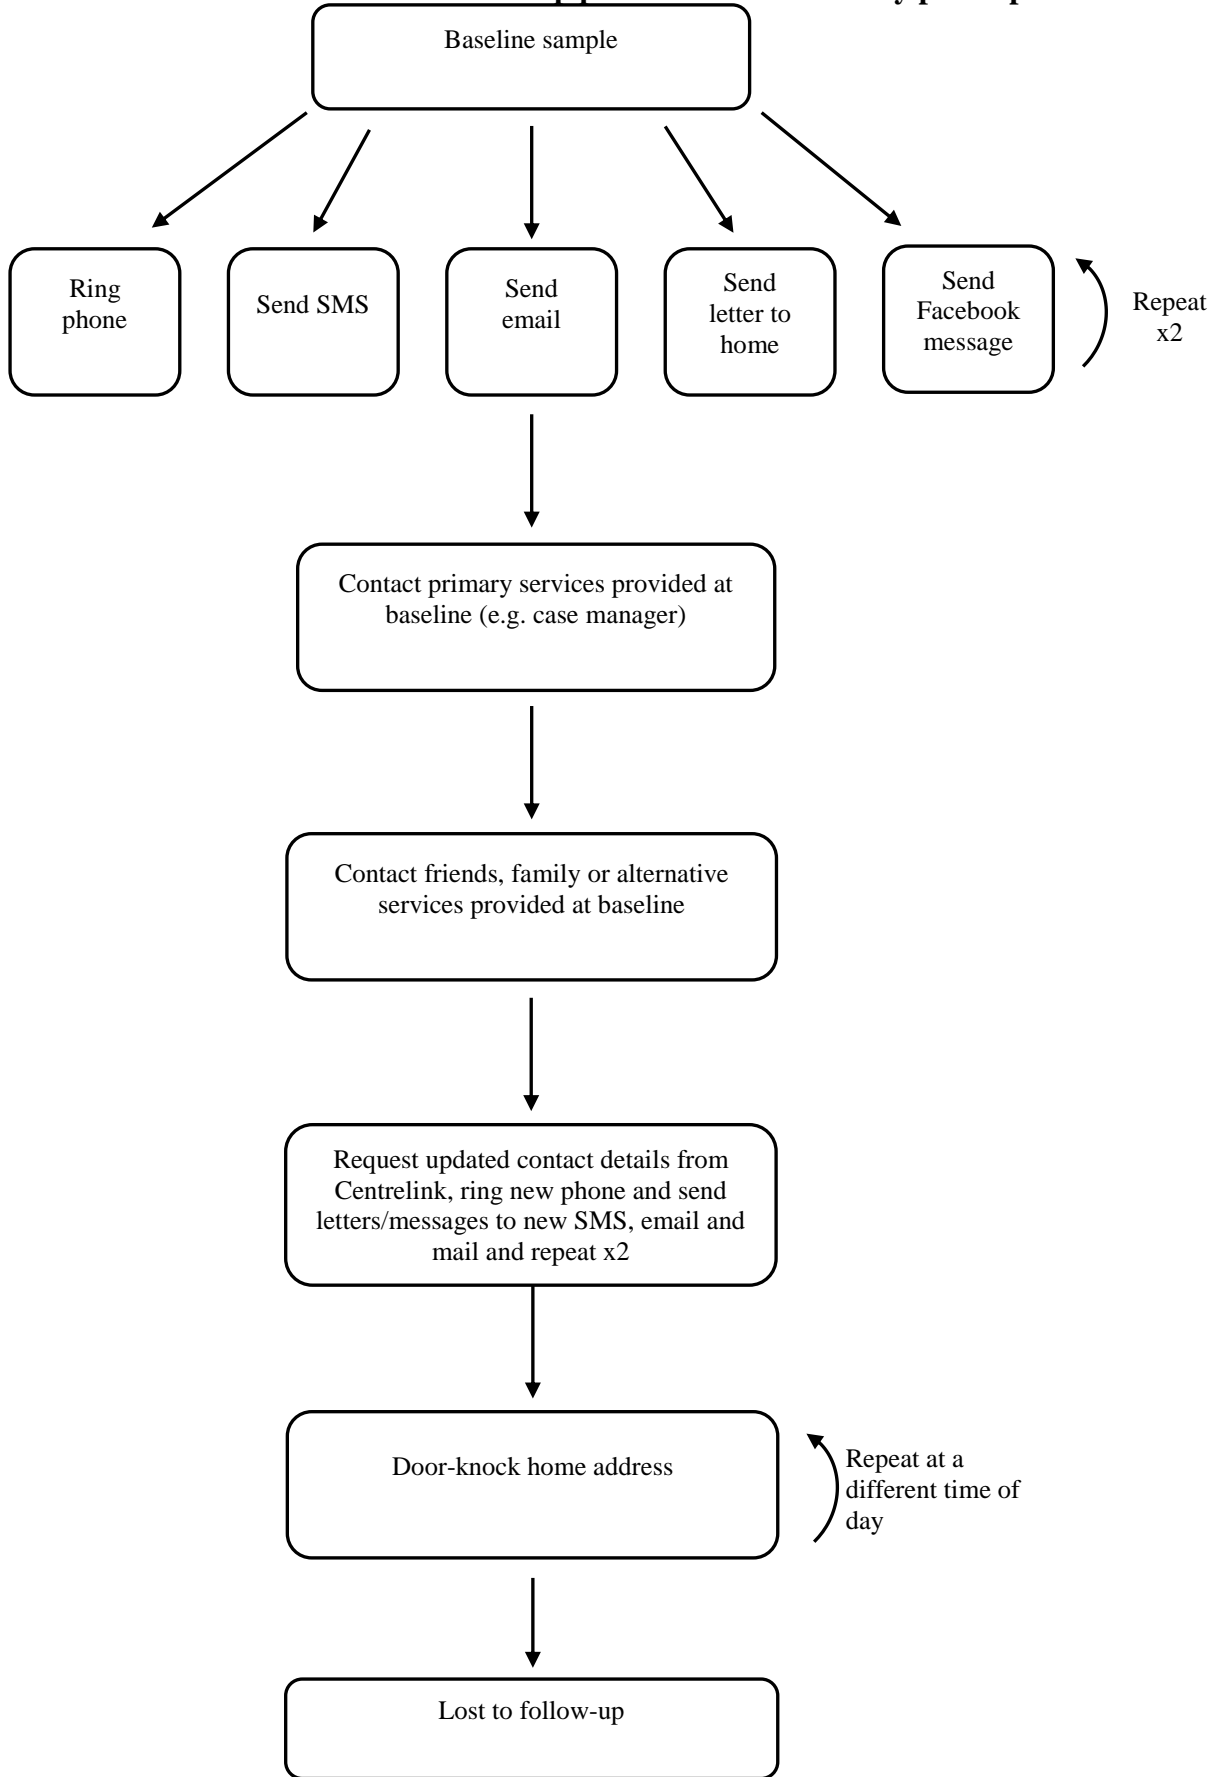

Supplement: MOESM3 [file 9749226]
